# Supplementary material for: New Dibenzo-α-pyrone Derivatives with α-Glucosidase Inhibitory Activities from the Marine-Derived Fungus Alternaria alternata
Source: MDPI journal article supplement (doi:10.3390/md20120778), 2022-12-14
Supplement: s1 [file s1]

## Supplemental material

# **New dibenzo- $\alpha$ -pyrone derivatives with $\alpha$ -glucosidase inhibitory activities from the marine-derived fungus *Alternaria alternata***

Jinxin Zhang <sup>1,2</sup>, Baodan Zhang <sup>1,2</sup>, Lei Cai <sup>1,2</sup> and Ling Liu <sup>1,2,\*</sup>

1 State Key Laboratory of Mycology, Institute of Microbiology, Chinese Academy of Sciences, Beijing 100101, China

2 University of Chinese Academy of Sciences, Beijing 100049, China

\* Correspondence: liul@im.ac.cn; Tel.: +86-10-64807043

## Table of Contents

|                                                                                                                                                                   |     |
|-------------------------------------------------------------------------------------------------------------------------------------------------------------------|-----|
| <b>Table S1.</b> Component for the culture media                                                                                                                  | S2  |
| <b>Figure S1.</b> HPLC-UV analysis of metabolic profiles cultured in six media at 280 nm                                                                          | S2  |
| <b>Figure S2.</b> Maximum likelihood tree of <i>Alternaria</i> sect. <i>Alternaria</i> based on sequences of <i>LSU</i> , <i>SSU</i> , <i>ITS</i> and <i>RPB2</i> | S3  |
| <b>Figure S3.</b> The colony and spore morphology of strain <i>A. alternata</i> LW37                                                                              | S4  |
| <b>Figure S4.</b> <sup>1</sup> H NMR spectrum of alternolide A (1; 500 MHz, CD <sub>3</sub> OD)                                                                   | S5  |
| <b>Figure S5.</b> <sup>13</sup> C NMR spectrum of alternolide A (1; 125 MHz, CD <sub>3</sub> OD)                                                                  | S5  |
| <b>Figure S6.</b> HSQC spectrum of alternolide A (1; 500 MHz, CD <sub>3</sub> OD)                                                                                 | S6  |
| <b>Figure S7.</b> <sup>1</sup> H- <sup>1</sup> H COSY spectrum of alternolide A (1; 500 MHz, CD <sub>3</sub> OD)                                                  | S6  |
| <b>Figure S8.</b> HMBC spectrum of alternolide A (1; 500 MHz, CD <sub>3</sub> OD)                                                                                 | S7  |
| <b>Figure S9.</b> NOESY spectrum of alternolide A (1; 500 MHz, CD <sub>3</sub> OD)                                                                                | S7  |
| <b>Figure S10.</b> <sup>1</sup> H NMR spectrum of alternolide B (2; 500 MHz, CD <sub>3</sub> OD)                                                                  | S8  |
| <b>Figure S11.</b> <sup>13</sup> C NMR spectrum of alternolide B (2; 125 MHz, CD <sub>3</sub> OD)                                                                 | S8  |
| <b>Figure S12.</b> HSQC spectrum of alternolide B (2; 500 MHz, CD <sub>3</sub> OD)                                                                                | S9  |
| <b>Figure S13.</b> <sup>1</sup> H- <sup>1</sup> H COSY spectrum of alternolide B (2; 500 MHz, CD <sub>3</sub> OD)                                                 | S9  |
| <b>Figure S14.</b> HMBC spectrum of alternolide B (2; 500 MHz, CD <sub>3</sub> OD)                                                                                | S10 |
| <b>Figure S15.</b> NOESY spectrum of alternolide B (2; 500 MHz, CD <sub>3</sub> OD)                                                                               | S10 |
| <b>Figure S16.</b> <sup>1</sup> H NMR spectrum of alternolide C (3; 500 MHz, CD <sub>3</sub> OD)                                                                  | S11 |
| <b>Figure S17.</b> <sup>13</sup> C NMR spectrum of alternolide C (3; 125 MHz, CD <sub>3</sub> OD)                                                                 | S11 |
| <b>Figure S18.</b> HSQC spectrum of alternolide C (3; 500 MHz, CD <sub>3</sub> OD)                                                                                | S12 |
| <b>Figure S19.</b> <sup>1</sup> H- <sup>1</sup> H COSY spectrum of alternolide C (3; 500 MHz, CD <sub>3</sub> OD)                                                 | S12 |
| <b>Figure S20.</b> HMBC spectrum of alternolide C (3; 500 MHz, CD <sub>3</sub> OD)                                                                                | S13 |
| <b>Figure S21.</b> NOESY spectrum of alternolide C (3; 500 MHz, CD <sub>3</sub> OD)                                                                               | S13 |
| <b>Figure S22.</b> HRESIMS spectrum of alternolide A (1)                                                                                                          | S14 |
| <b>Figure S23.</b> HRESIMS spectrum of alternolide B (2)                                                                                                          | S14 |
| <b>Figure S24.</b> HRESIMS spectrum of alternolide C (3)                                                                                                          | S14 |
| <b>Figure S25.</b> Infrared spectrum of alternolide A (1)                                                                                                         | S15 |
| <b>Figure S26.</b> Infrared spectrum of alternolide B (2)                                                                                                         | S15 |
| <b>Figure S27.</b> Infrared spectrum of alternolide C (3)                                                                                                         | S15 |
| <b>Figure S28.</b> ECD spectrum of alternolide A (1)                                                                                                              | S16 |
| <b>Figure S29.</b> ECD spectrum of alternolide B (2)                                                                                                              | S16 |
| <b>Figure S30.</b> ECD spectrum of alternolide C (3)                                                                                                              | S17 |
| <b>Figure S31.</b> ECD spectrum of 1-deoxyrubralactone (9)                                                                                                        | S17 |
| <b>Figure S32.</b> ECD conformers of alternolide A (1)                                                                                                            | S18 |
| <b>Figure S33.</b> ECD conformers of alternolide B (2)                                                                                                            | S20 |
| <b>Figure S34.</b> ECD conformers of alternolide C (3)                                                                                                            | S22 |
| <b>Figure S35.</b> ECD conformers of 1-deoxyrubralactone (9)                                                                                                      | S25 |

**Table S1 Component for the culture media**

| Media | Phase  | Component                                                            |
|-------|--------|----------------------------------------------------------------------|
| PDB   | liquid | 20% potato, 2% glucose                                               |
| YES   | liquid | 15% sucrose, 2% yeast extract                                        |
| SWS   | liquid | 1% starch, 0.1% peptone                                              |
| YMG   | liquid | 0.4% glucose, 0.4% yeast extract, 1% maltose                         |
| GPY   | liquid | 1% glucose, 0.5% peptone, 0.1% yeast extract, 0.1% CaCO <sub>3</sub> |
| Rice  | solid  | rice 100 g, distilled H <sub>2</sub> O 110 mL                        |

The liquid media incubated at 28°C for 7 days under on an orbital shaker at 200 rpm; The solid media incubated at 25°C under static condition for 30 days.

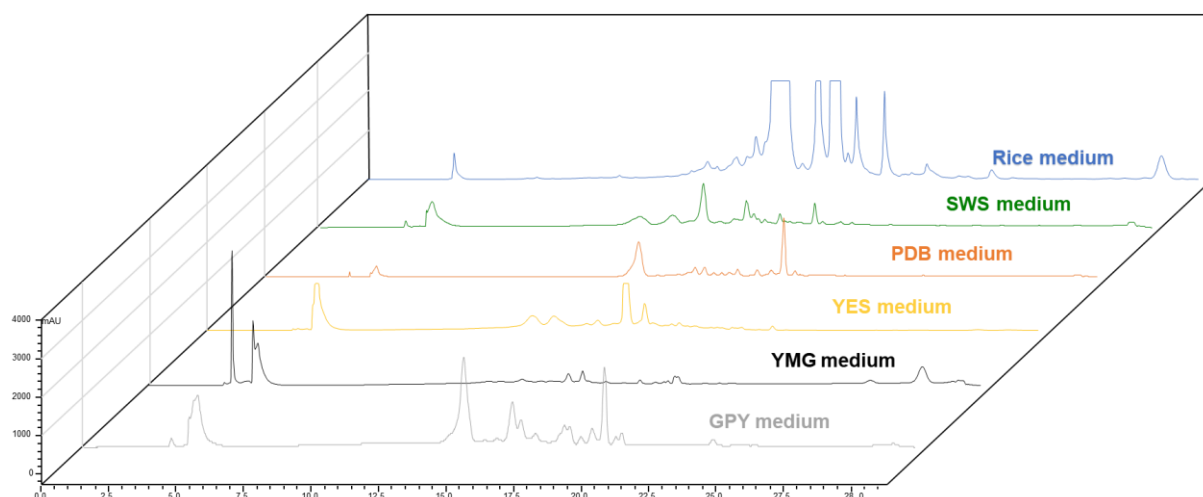

**Figure S1.** HPLC-UV analysis of metabolic profiles cultured in six media at 280 nm

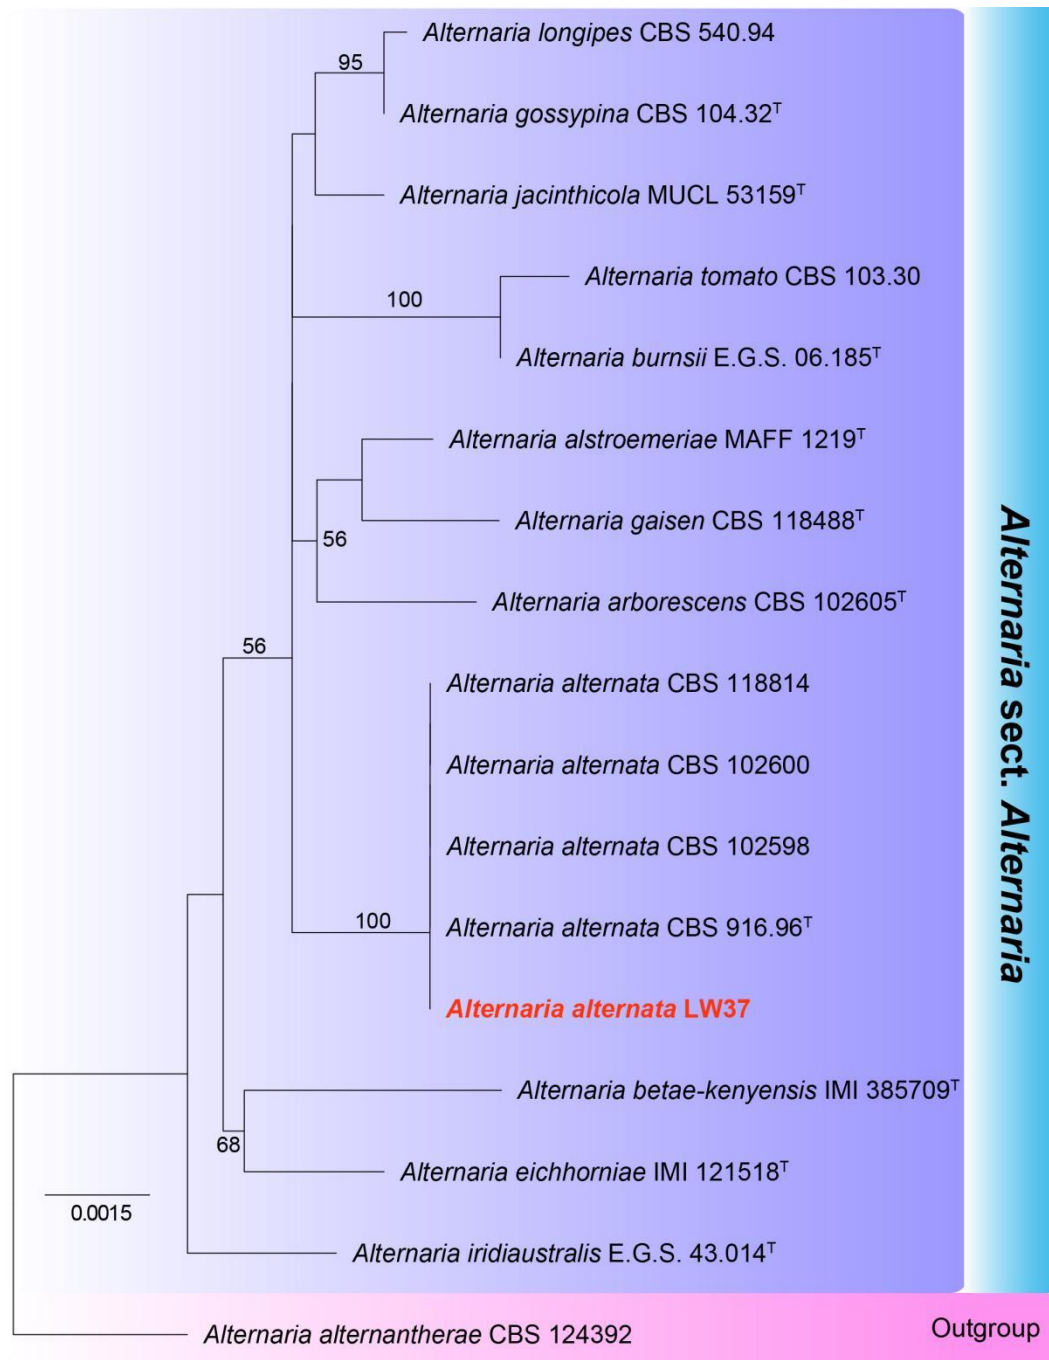

Figure S2. Maximum likelihood tree of *Alternaria* sect. *Alternaria* based on sequences of *LSU*, *SSU*, *ITS* and *RPB2*. Bootstrap support values of maximum likelihood (MLBP) above 50% are shown at the nodes. The tree was rooted to *Alternaria alternantherae* CBS 124392. Type cultures are indicated with a letter "T" after the accession number. The strain LW37 is printed in red and bold font.

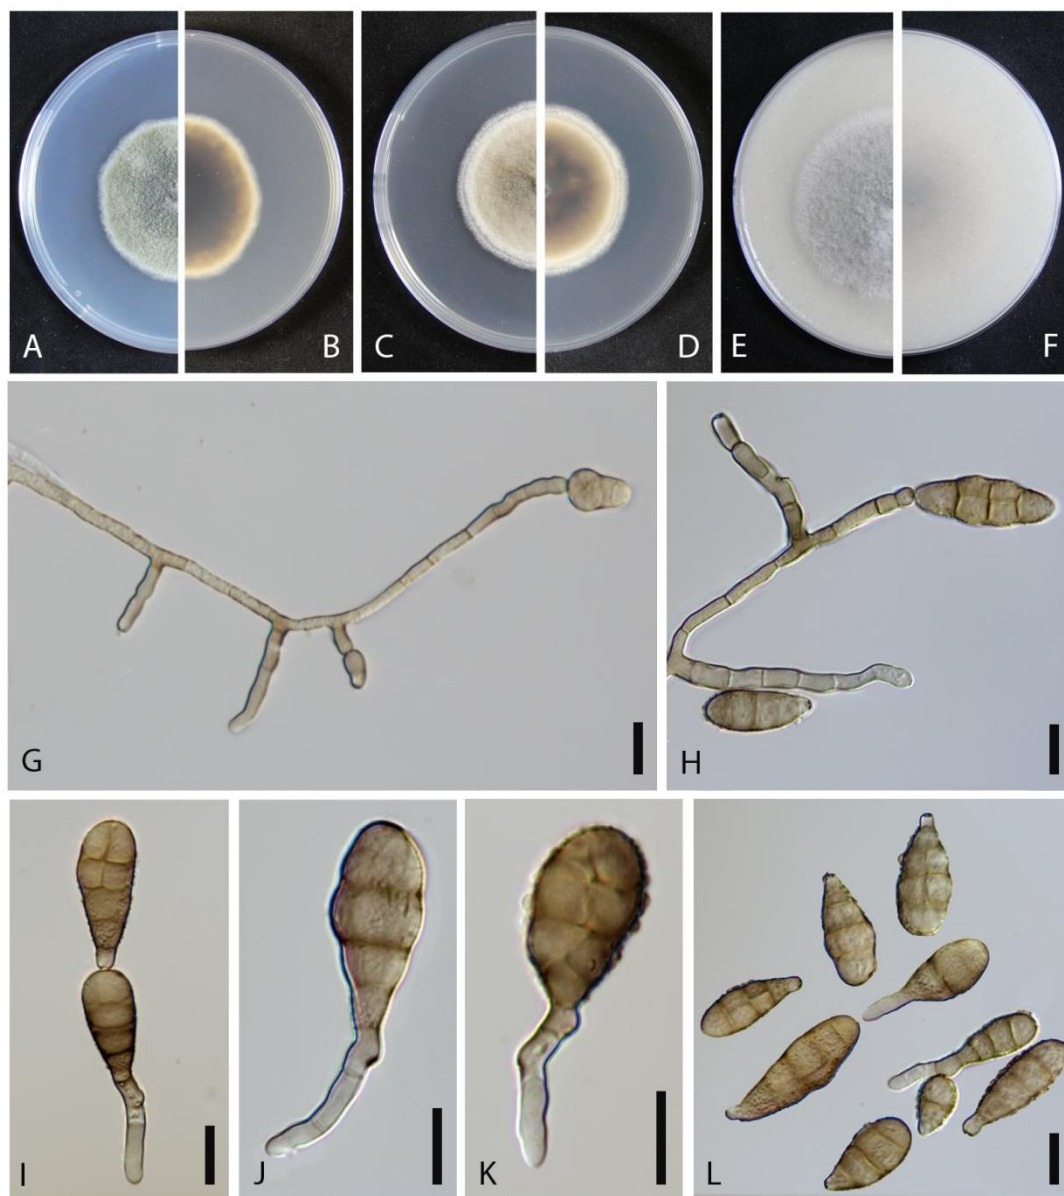

Figure S3. The colony and spore morphology of strain *Alternaria alternata* LW37. A, Surface and reverse of colony on PDA, MEA, OA and CYA. B, Sporulation on MEA. C-F, Conidiophores and conidiogenous cells. G, Conidia. Scale bars: C-G = 10 μm.

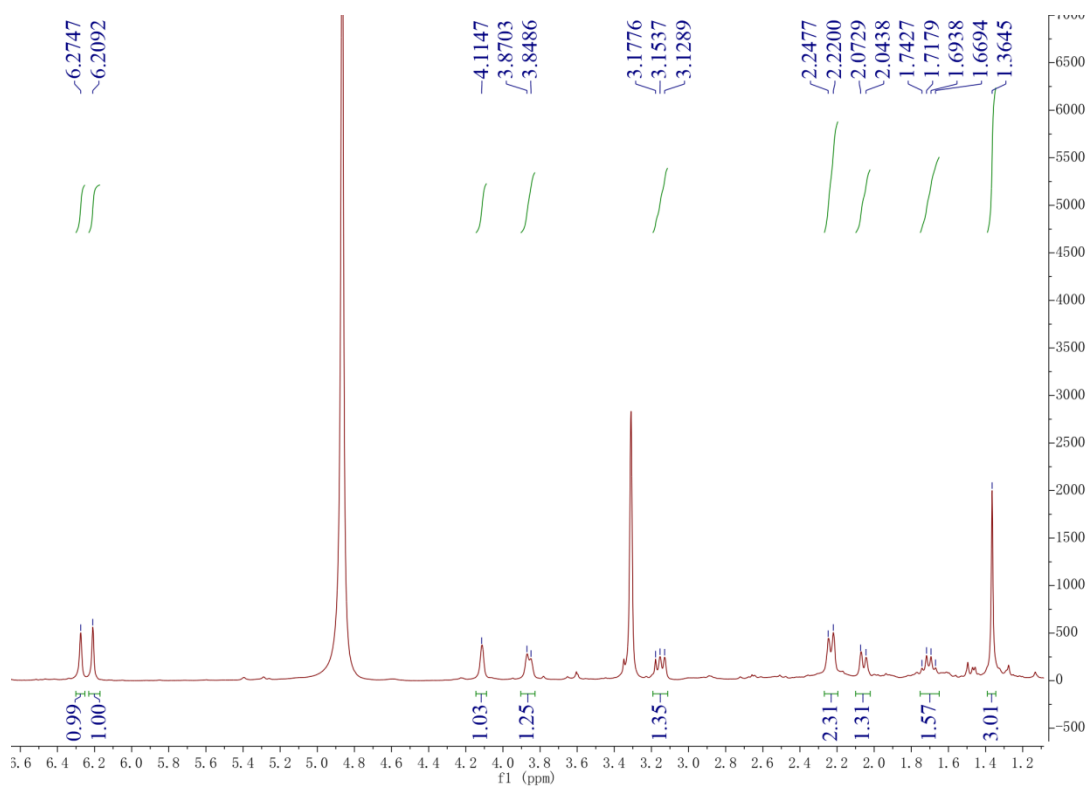

Figure S4. <sup>1</sup>H NMR spectrum of alternolide A (1; 500 MHz, CD<sub>3</sub>OD)

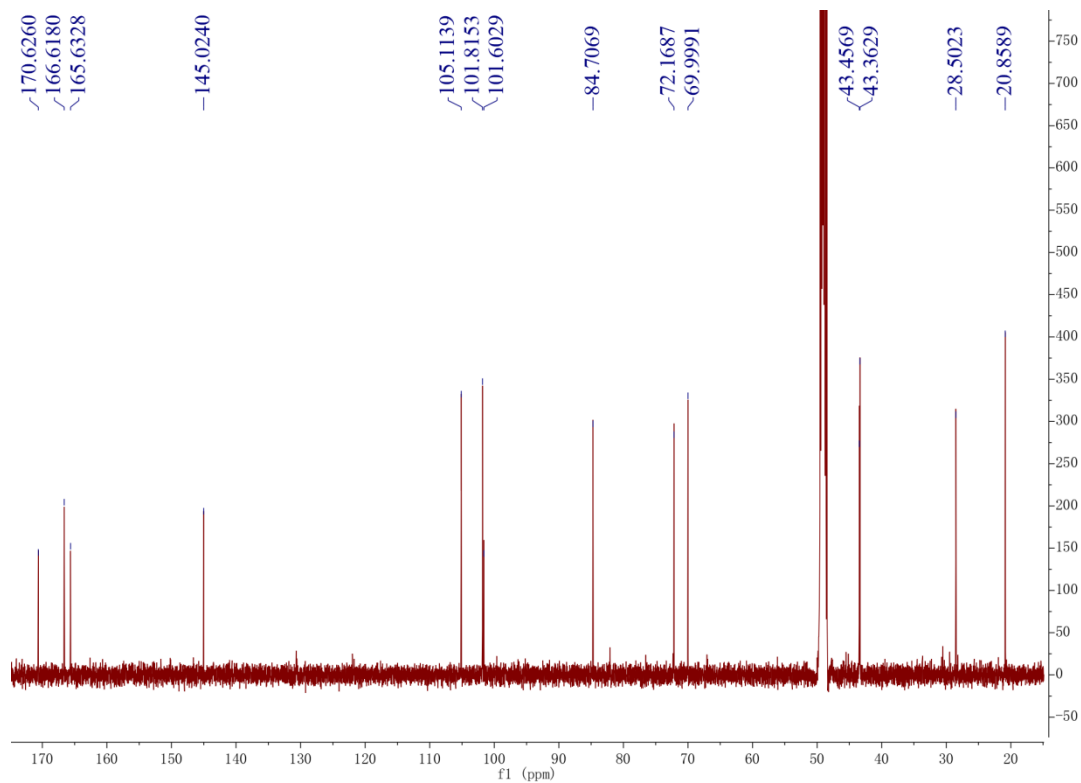

Figure S5. <sup>13</sup>C NMR spectrum of alternolide A (1; 125 MHz, CD<sub>3</sub>OD)

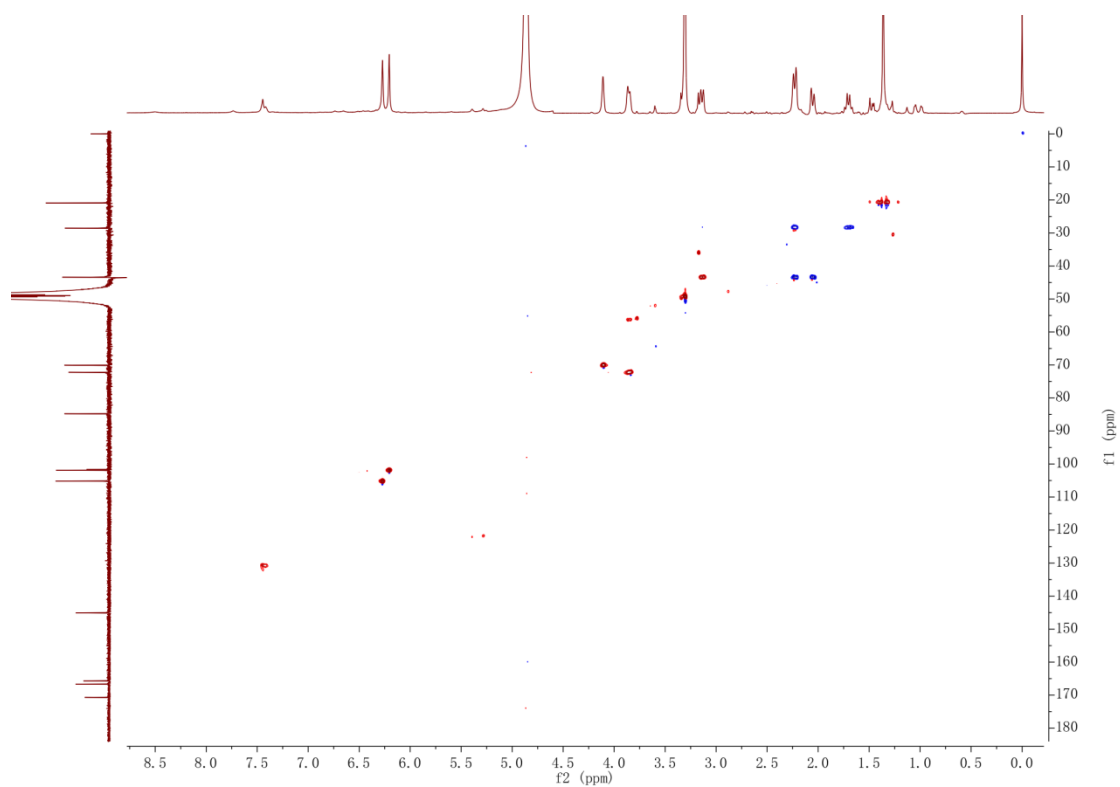

Figure S6. HSQC spectrum of alternolide A (1; 500 MHz, CD<sub>3</sub>OD)

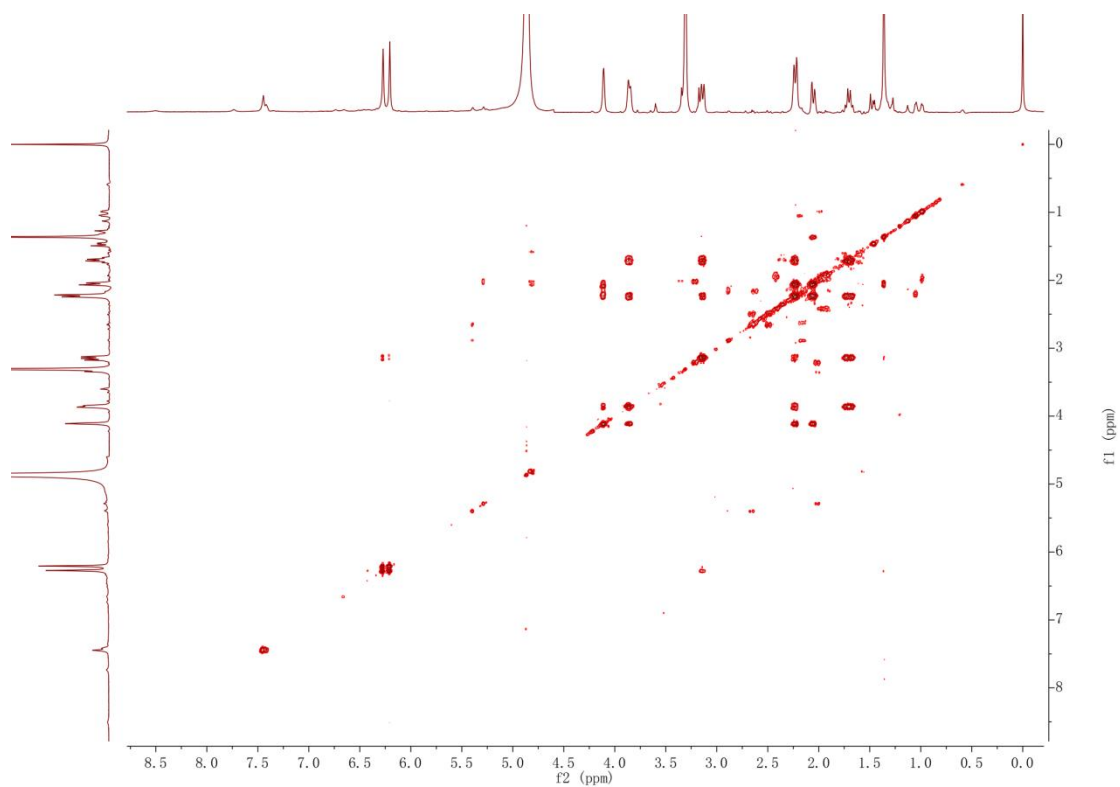

Figure S7. <sup>1</sup>H-<sup>1</sup>H COSY spectrum of alternolide A (1; 500 MHz, CD<sub>3</sub>OD)

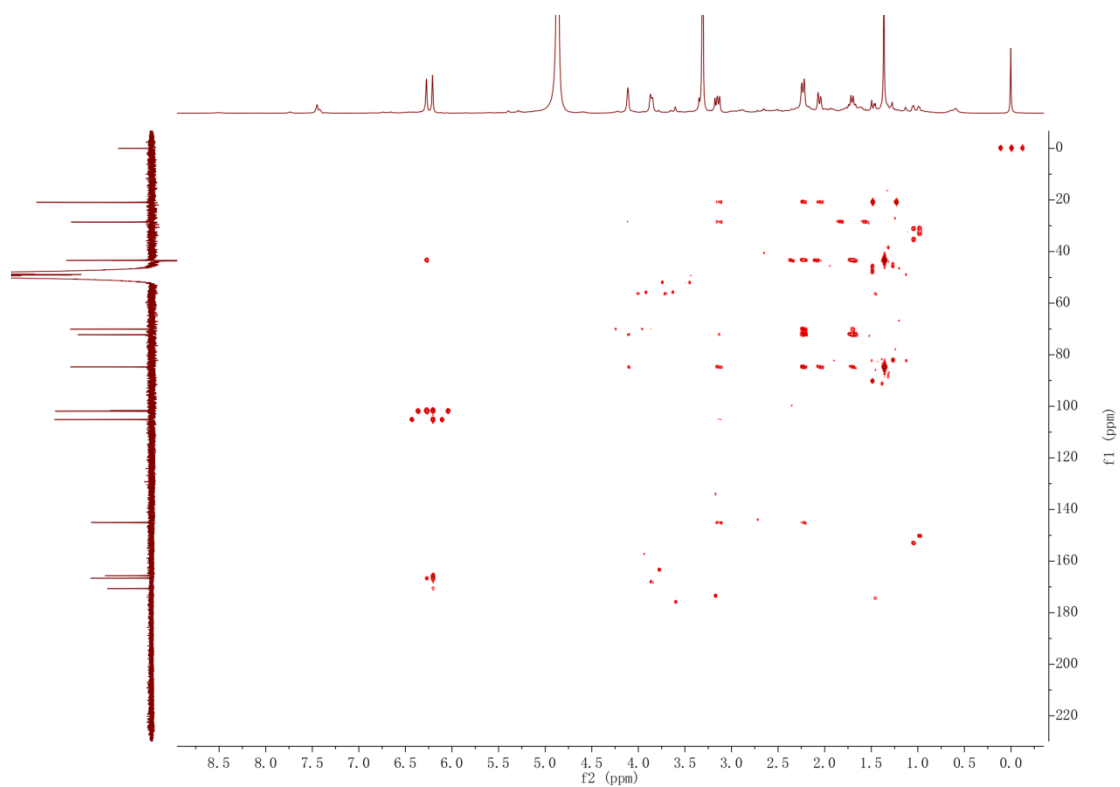

Figure S8. HMBC spectrum of alternolide A (**1**; 500 MHz, CD<sub>3</sub>OD)

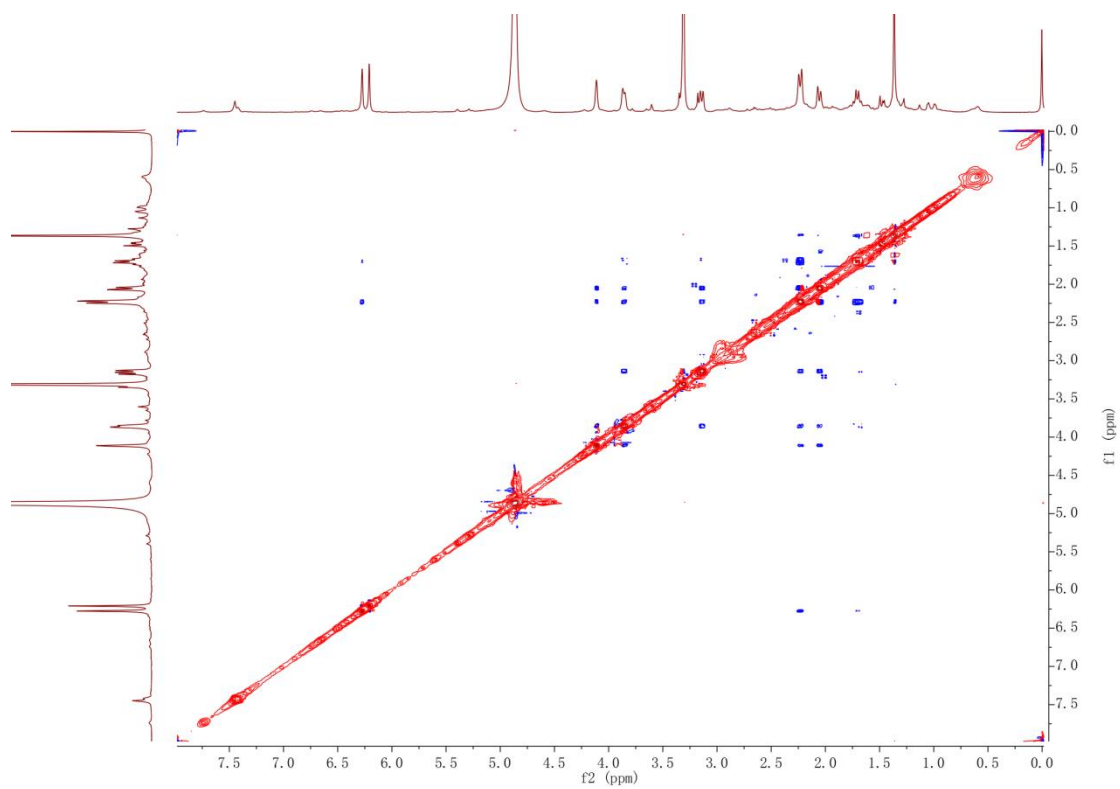

Figure S9. NOESY spectrum of alternolide A (**1**; 500 MHz, CD<sub>3</sub>OD)



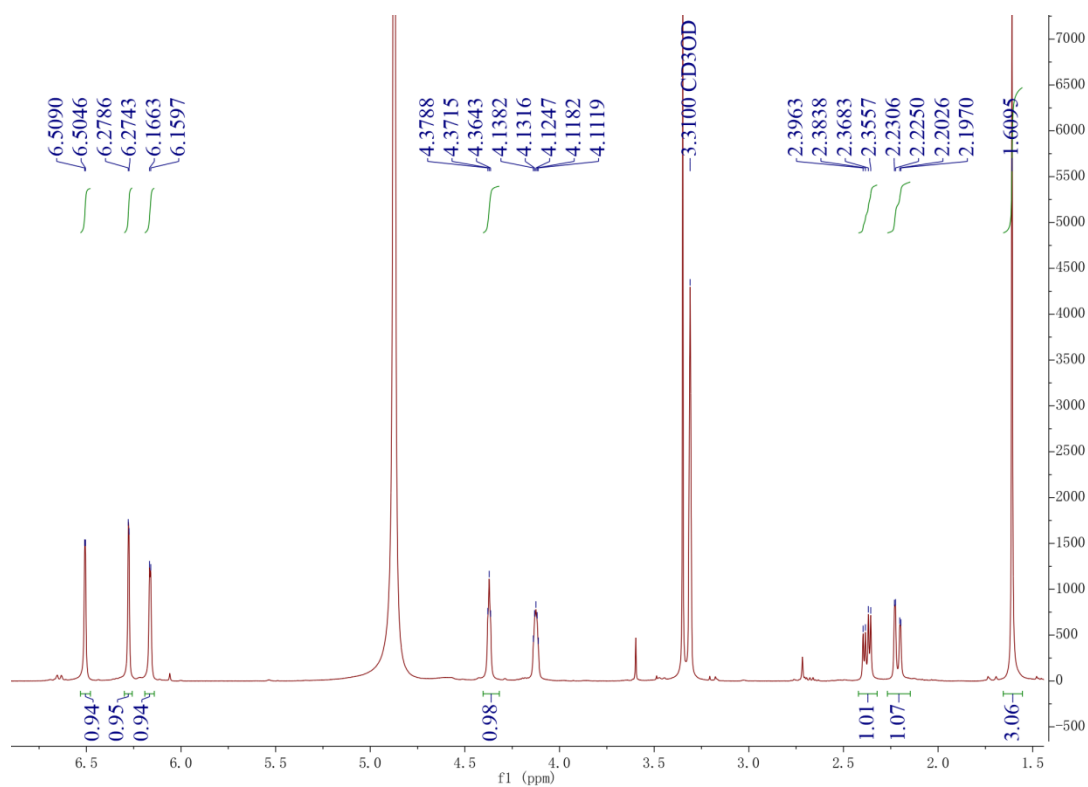

Figure S10. <sup>1</sup>H NMR spectrum of alternolide B (**2**; 500 MHz, CD<sub>3</sub>OD)

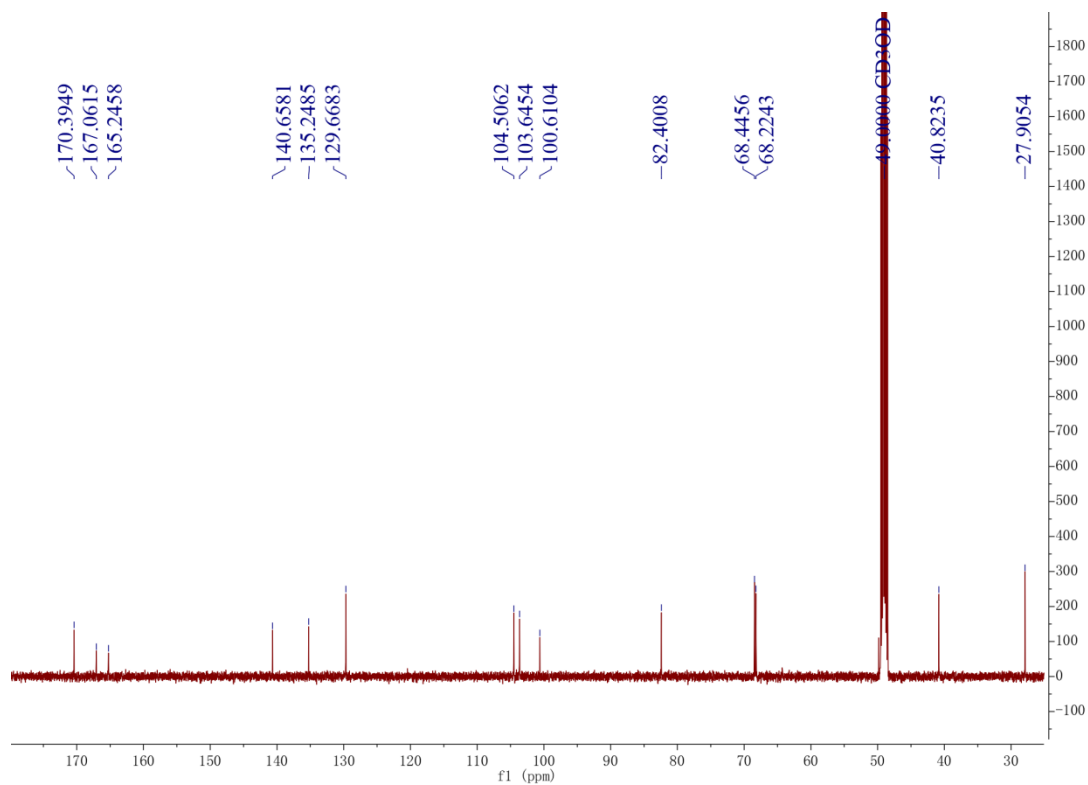

Figure S11. <sup>13</sup>C NMR spectrum of alternolide B (**2**; 125 MHz, CD<sub>3</sub>OD)

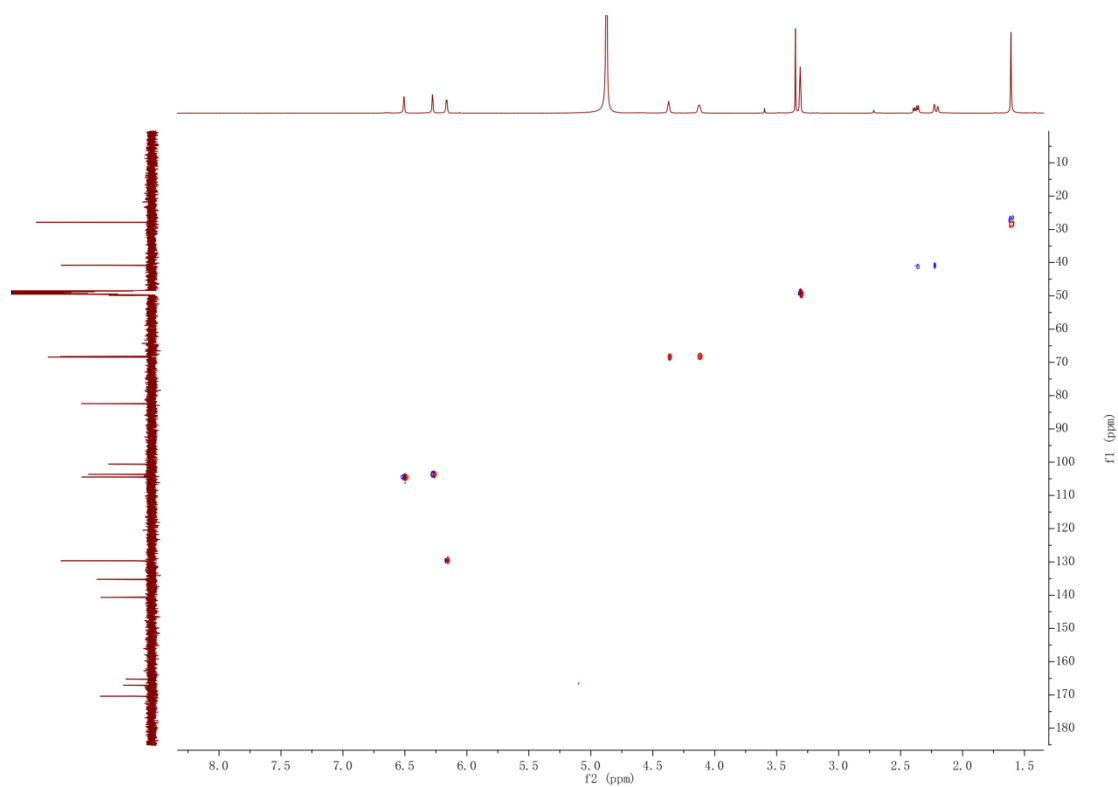

Figure S12. HSQC spectrum of alternolide B (**2**; 500 MHz, CD<sub>3</sub>OD)

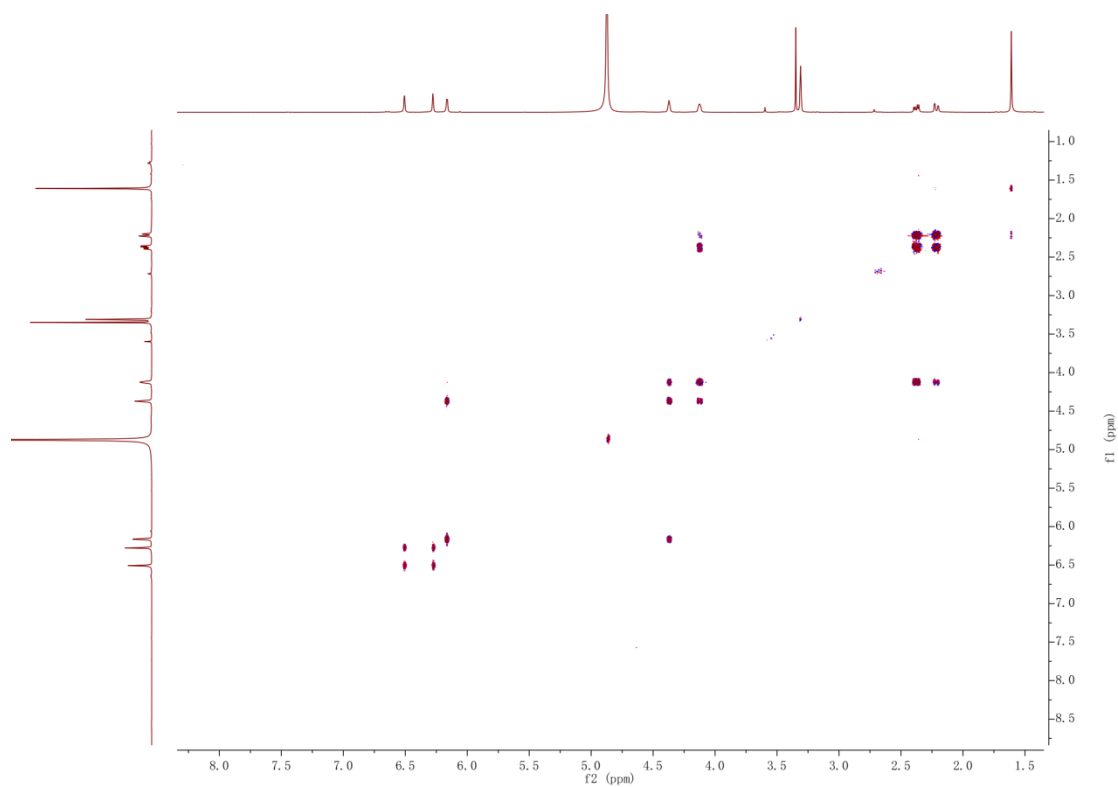

Figure S13. <sup>1</sup>H-<sup>1</sup>H COSY spectrum of alternolide B (**2**; 500 MHz, CD<sub>3</sub>OD)

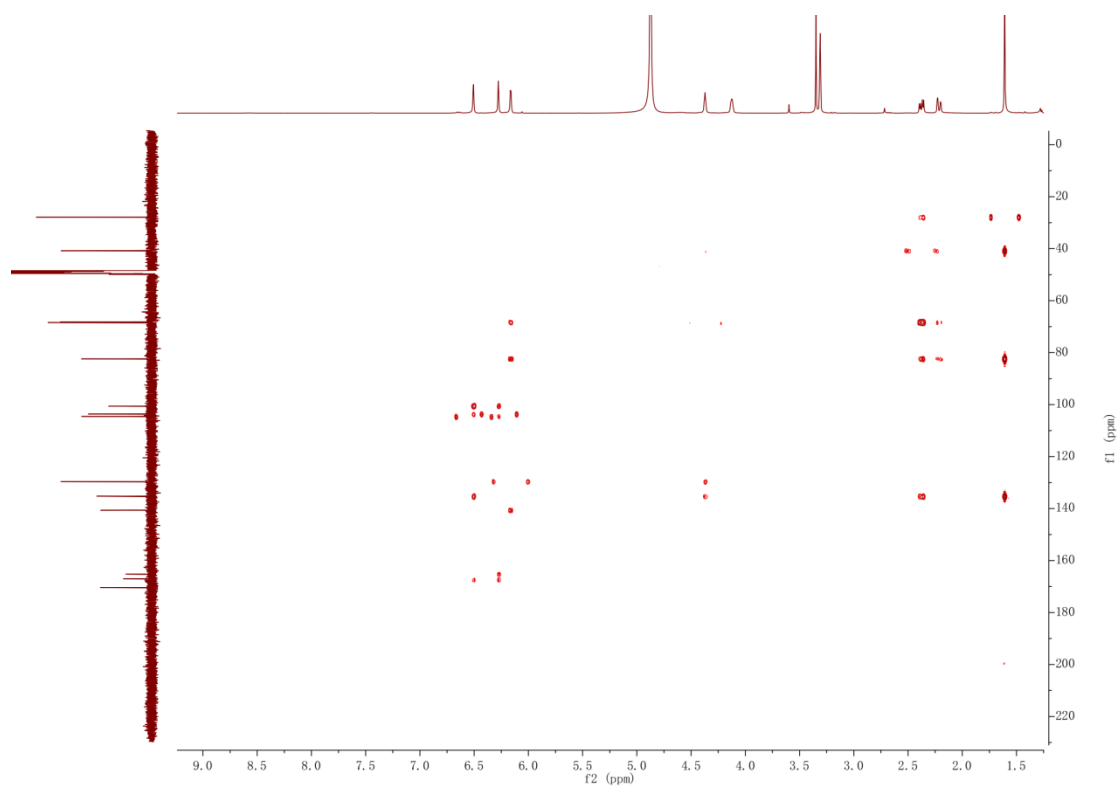

Figure S14. HMBC spectrum of alternolide B (**2**; 500 MHz, CD<sub>3</sub>OD)

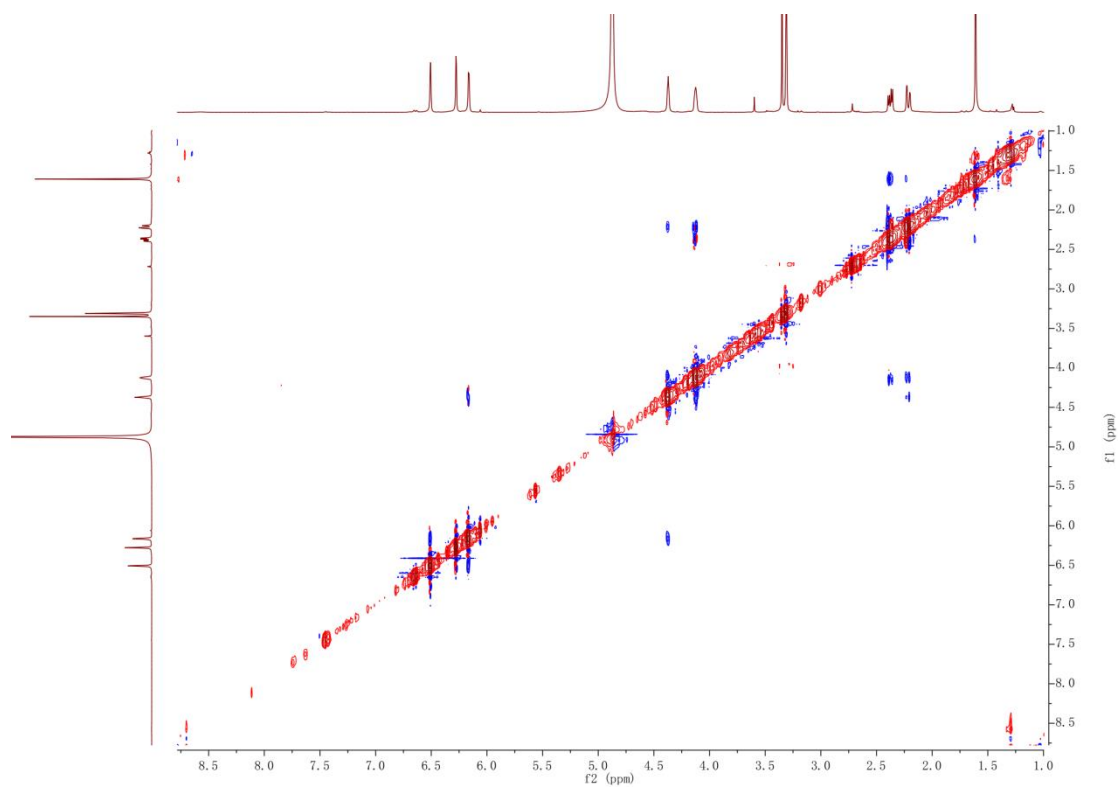

Figure S15. NOESY spectrum of alternolide B (**2**; 500 MHz, CD<sub>3</sub>OD)

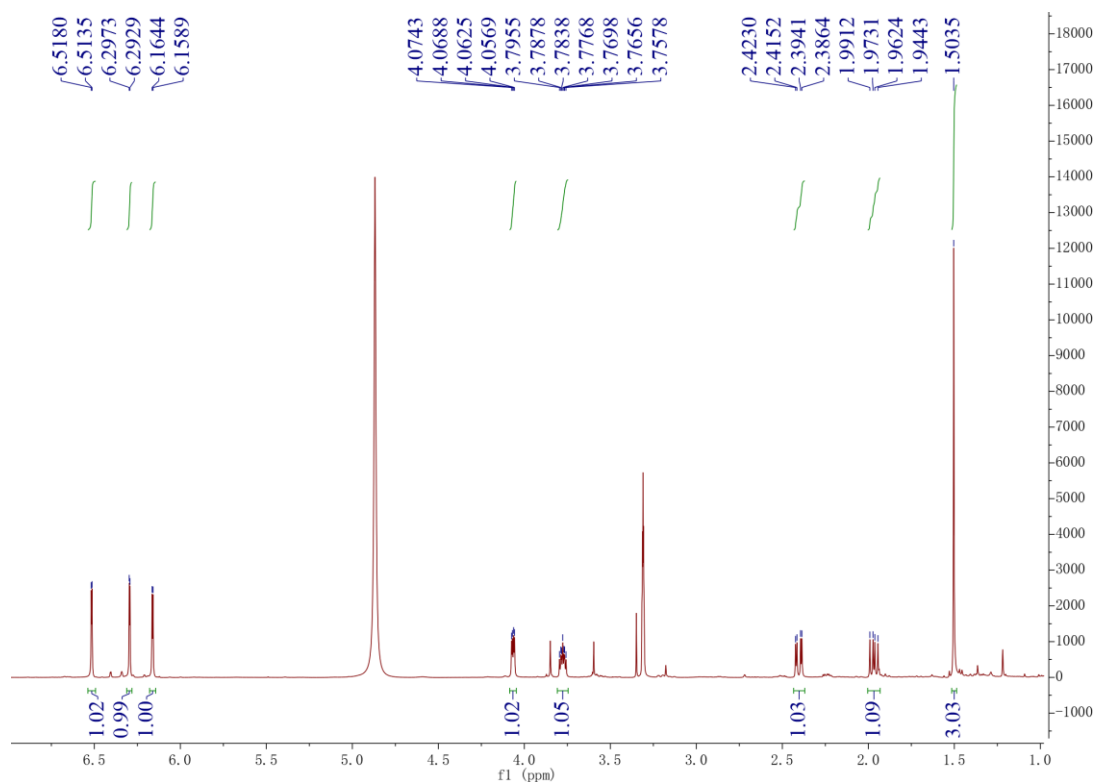

Figure S16. <sup>1</sup>H NMR spectrum of alternolide B (**3**; 500 MHz, CD<sub>3</sub>OD)

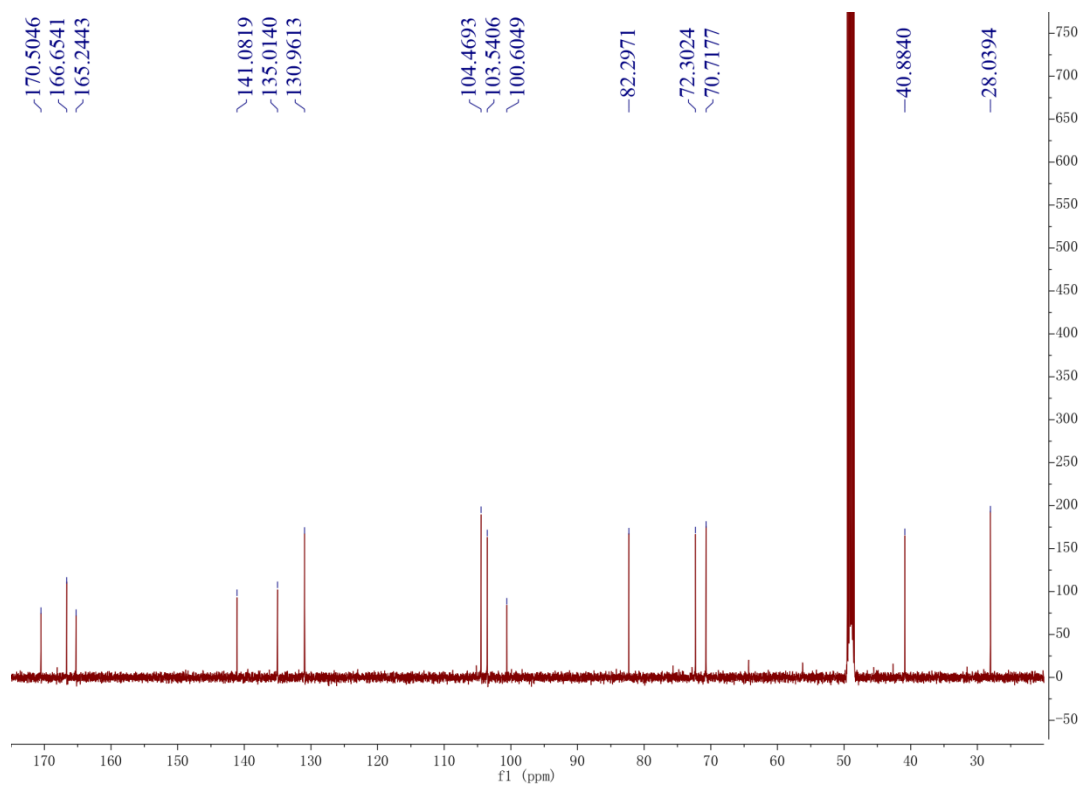

Figure S17. <sup>13</sup>C NMR spectrum of alternolide C (**3**; 125 MHz, CD<sub>3</sub>OD)

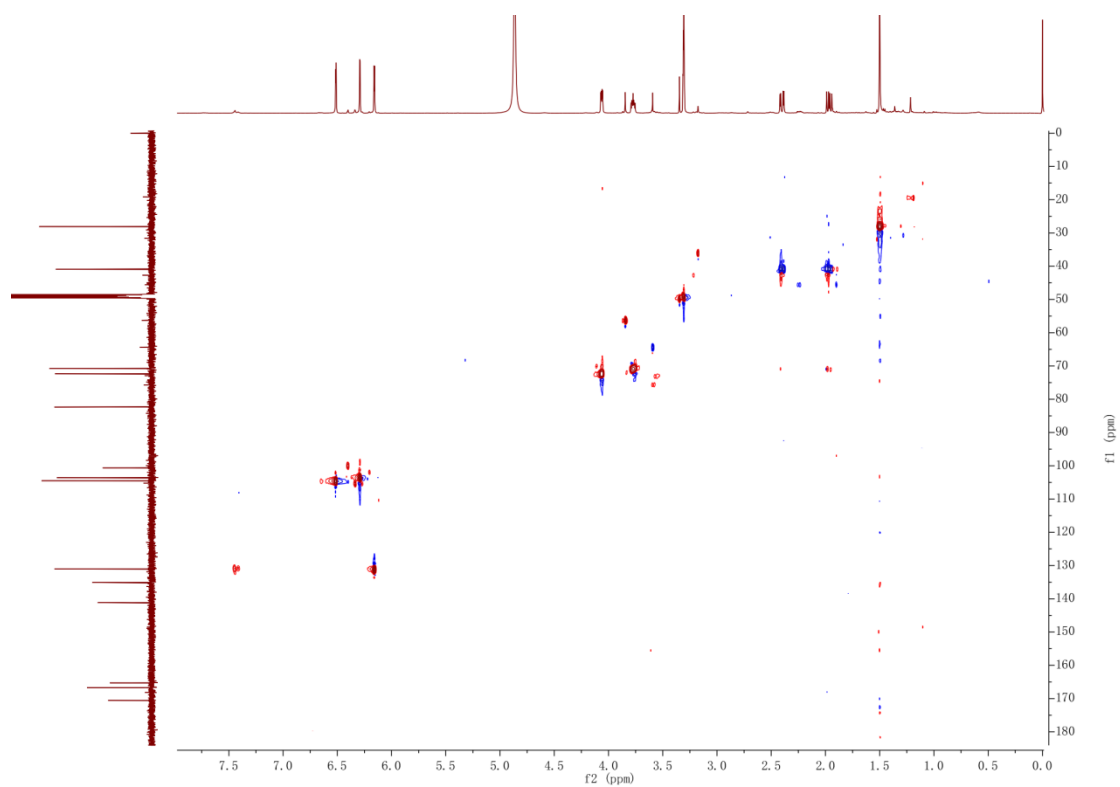

Figure S18. HSQC spectrum of alternolide C (**3**; 500 MHz, CD<sub>3</sub>OD)

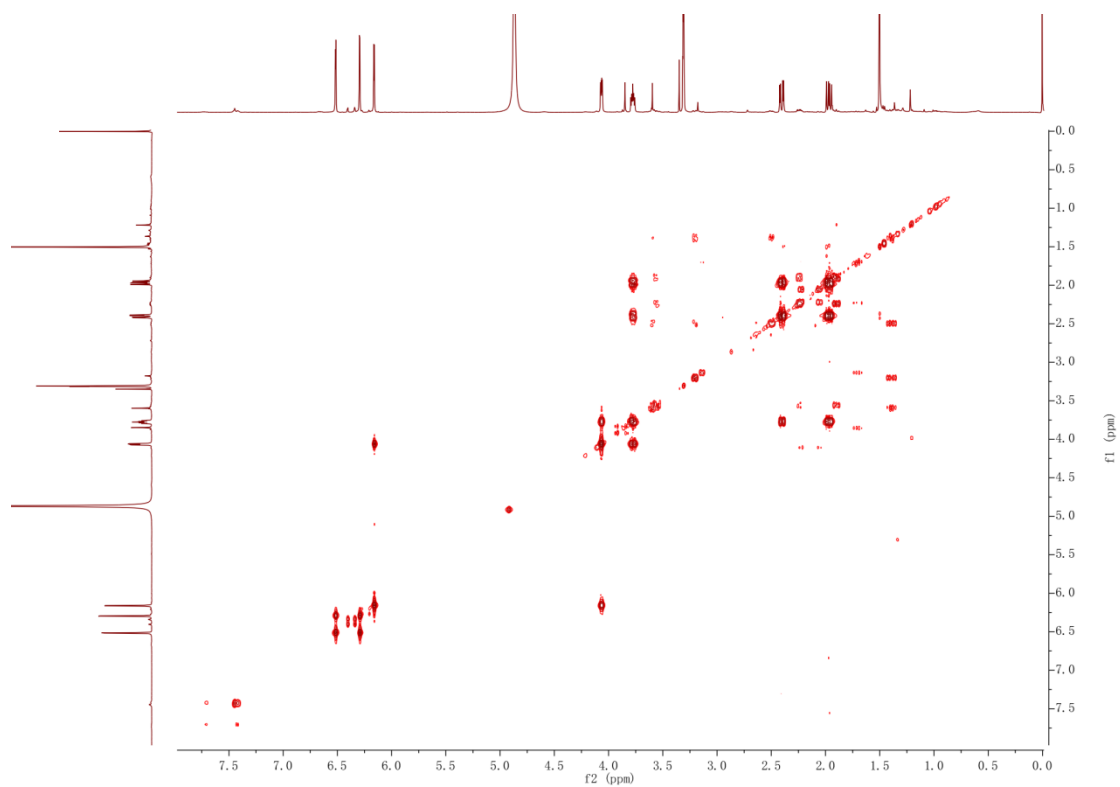

Figure S19. <sup>1</sup>H-<sup>1</sup>H COSY spectrum of alternolide C (**3**; 500 MHz, CD<sub>3</sub>OD)

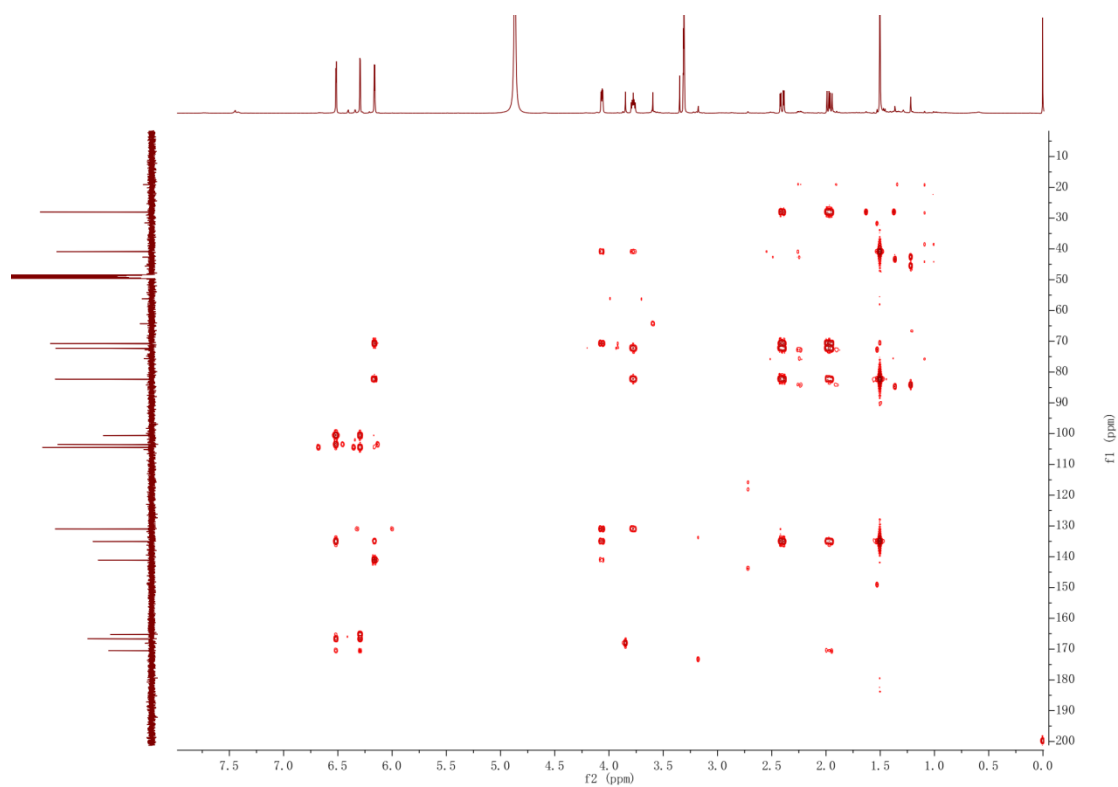

Figure S20. HMBC spectrum of alternolide C (3; 500 MHz, CD<sub>3</sub>OD)

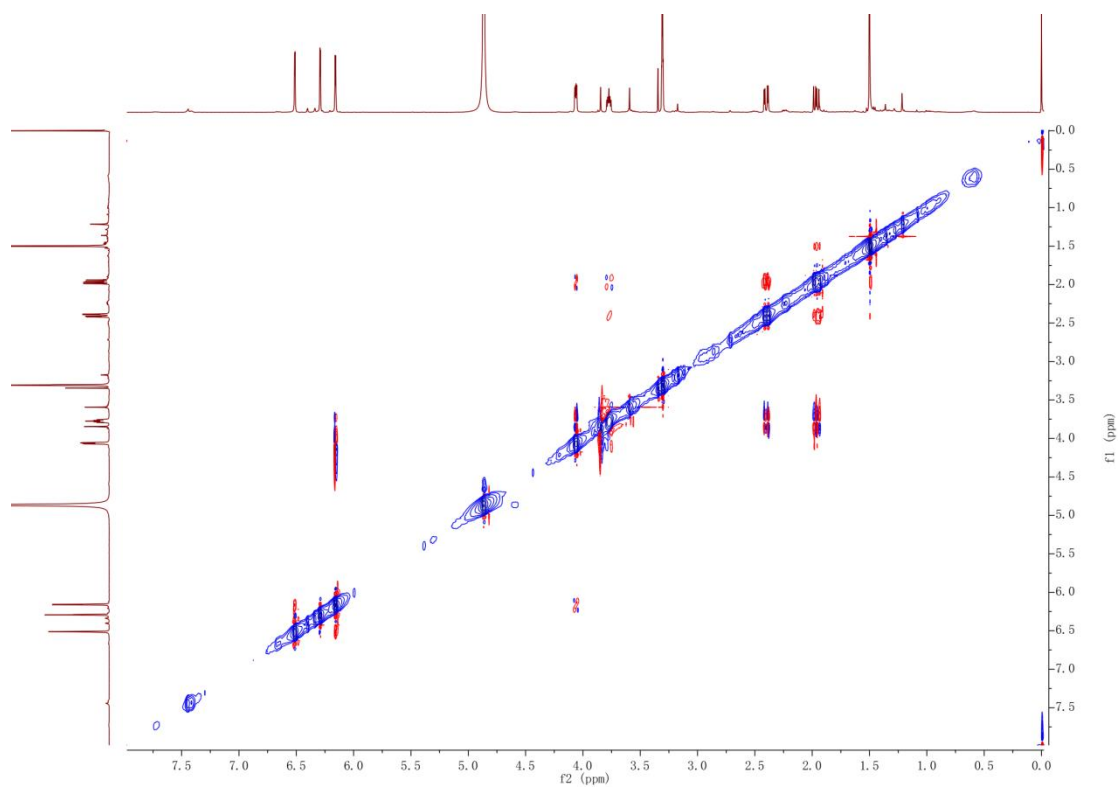

Figure S21. NOESY spectrum of alternolide C (3; 500 MHz, CD<sub>3</sub>OD)

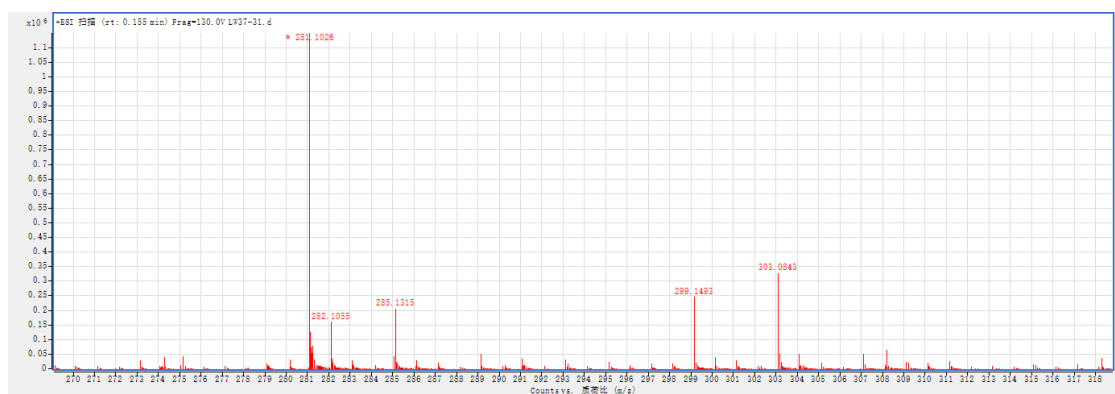

Figure S22. HRESIMS spectrum of alternolide A (1)

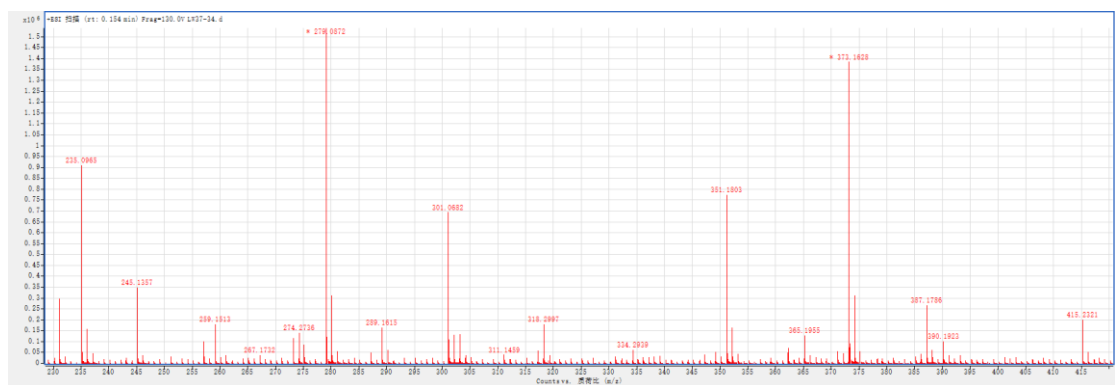

Figure S23. HRESIMS spectrum of alternolide B (2)

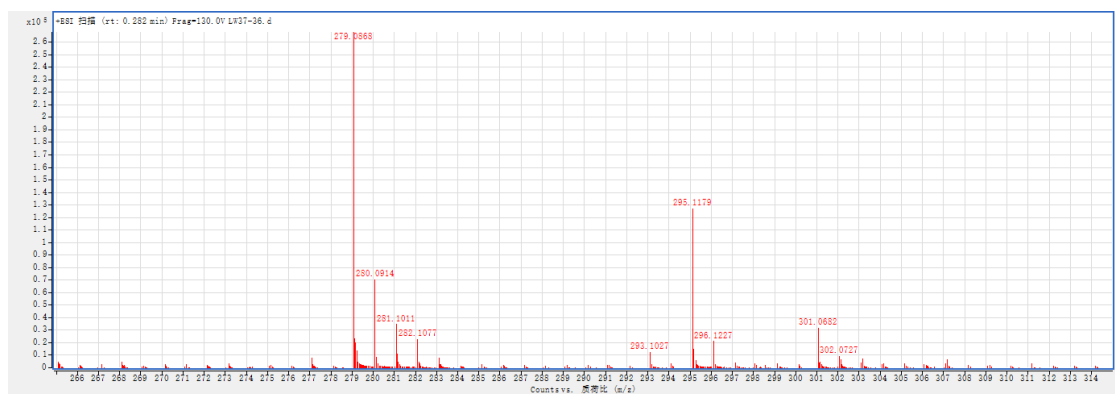

Figure S24. HRESIMS spectrum of alternolide C (3)

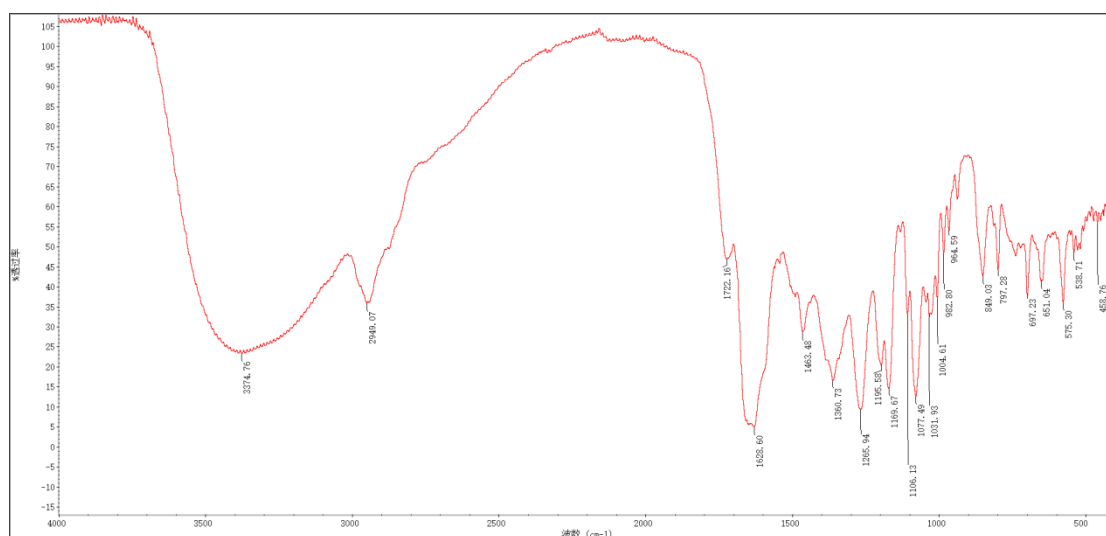

Figure S25. Infrared spectrum of alternolide A (1)

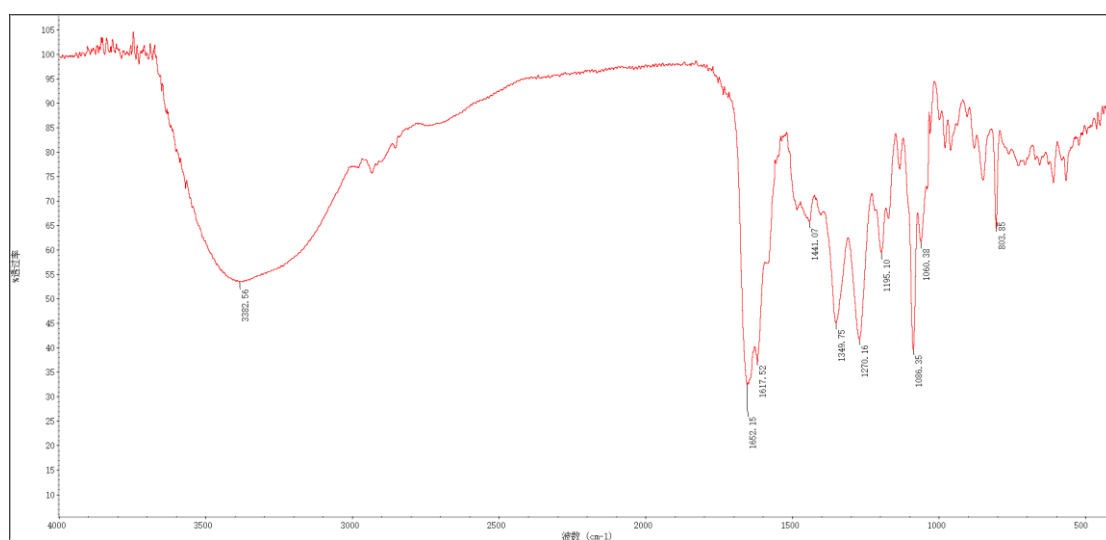

Figure S26. Infrared spectrum of alternolide B (2)

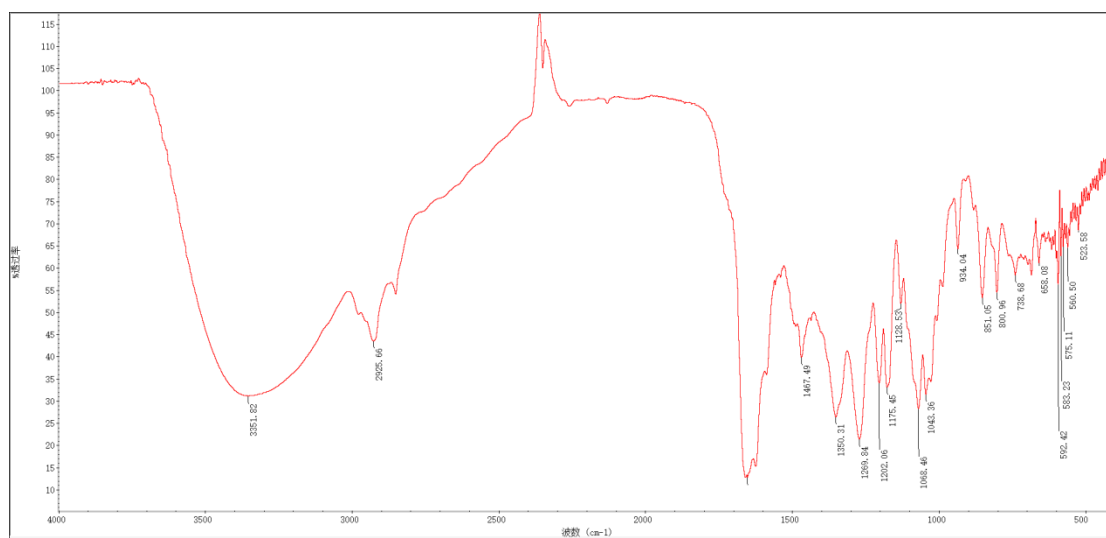

Figure S27. Infrared spectrum of alternolide C (3)



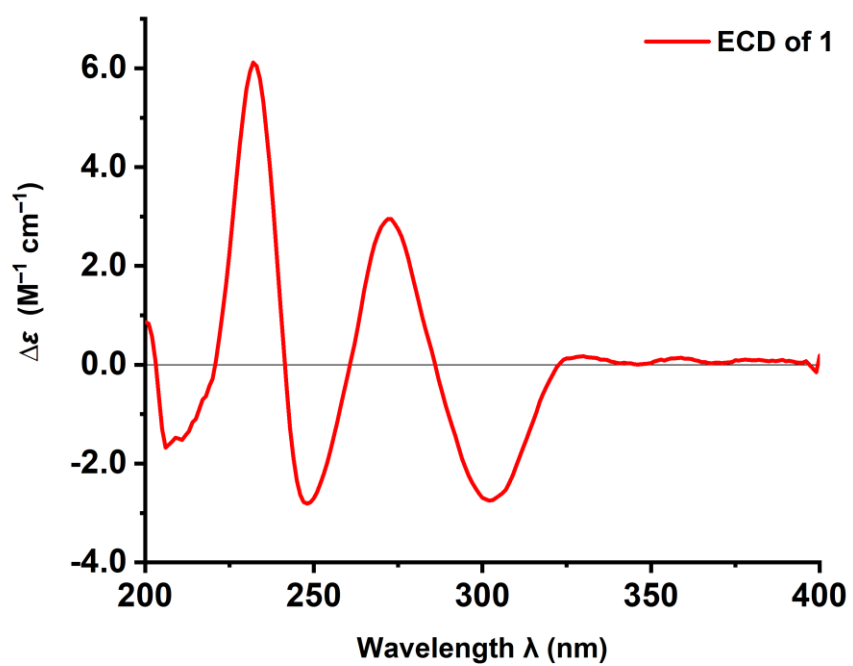

Figure S28. ECD spectrum of alternolide A (1)

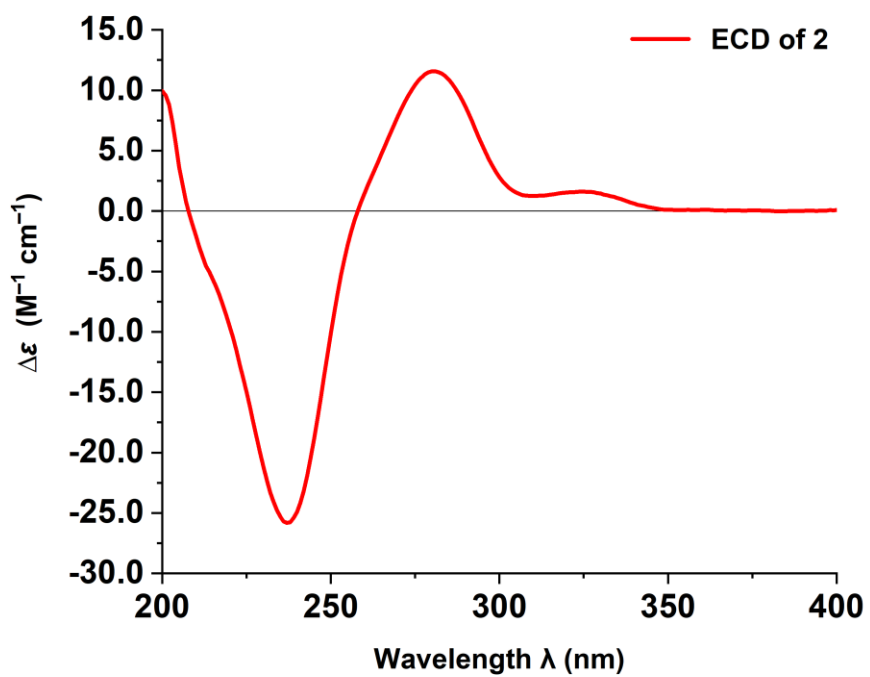

Figure S29. ECD spectrum of alternolide B (2)

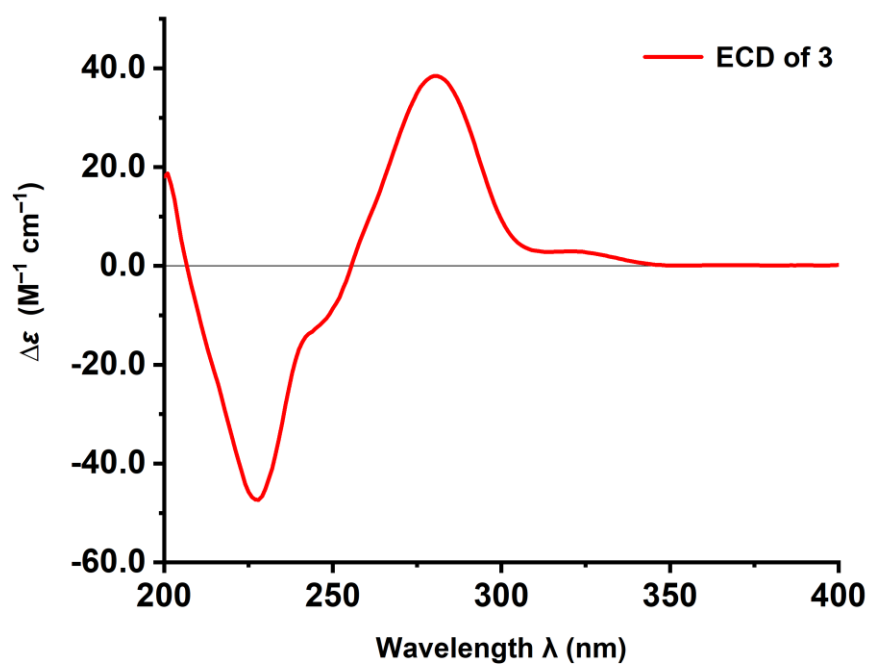

Figure S30. ECD spectrum of alternolide C (3)

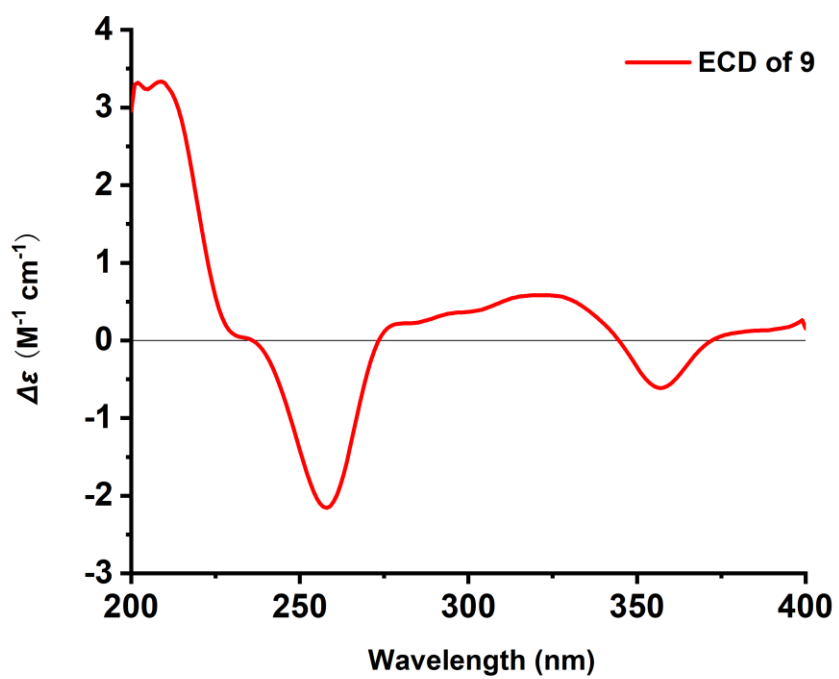

Figure S31. ECD spectrum of 1-deoxyrubralactone (9)

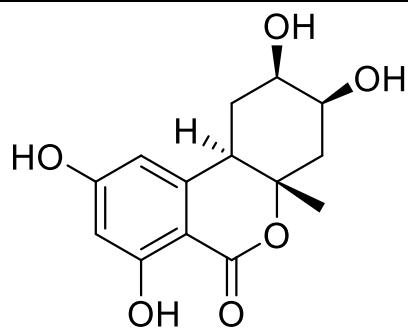

Conformers

Populations

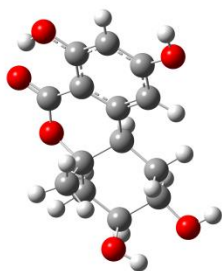

23.15%

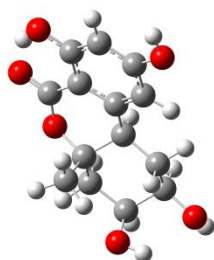

19.31%

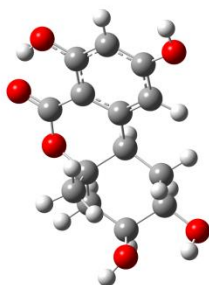

14.47%

|                                                                                     |        |
|-------------------------------------------------------------------------------------|--------|
| 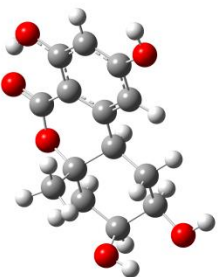   | 23.48% |
|    | 4.17%  |
|  | 4.99%  |
|  | 5.50%  |

|                                                                                   |              |
|-----------------------------------------------------------------------------------|--------------|
| 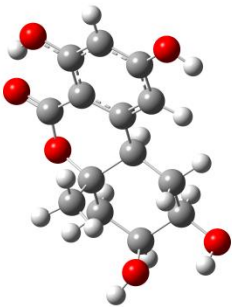 | <p>4.93%</p> |
|-----------------------------------------------------------------------------------|--------------|

Figure S32. ECD conformers of alternolide A (**1**)

| 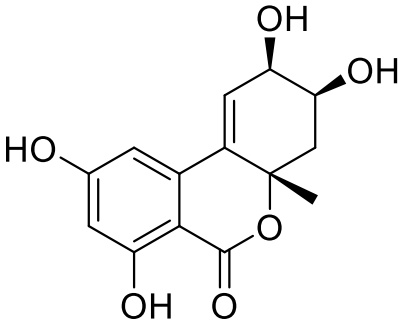  |               |
|-------------------------------------------------------------------------------------|---------------|
| Conformers                                                                          | Populations   |
|  | <p>12.38%</p> |
|  | <p>22.21%</p> |

|                                                                                     |               |
|-------------------------------------------------------------------------------------|---------------|
| 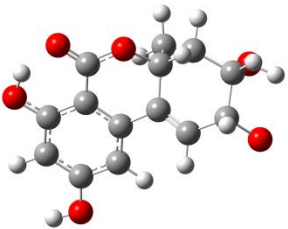   | <p>13.70%</p> |
|    | <p>25.30%</p> |
|  | <p>9.38%</p>  |
|  | <p>4.14%</p>  |

|                                                                                   |              |
|-----------------------------------------------------------------------------------|--------------|
| 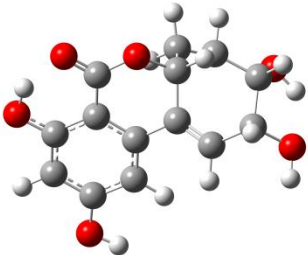 | <p>3.08%</p> |
|  | <p>9.81%</p> |

Figure S33. ECD conformers of alternolide B (2)

| 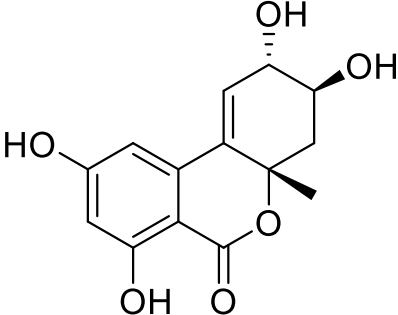 |               |
|-------------------------------------------------------------------------------------|---------------|
| Conformers                                                                          | Populations   |
|  | <p>20.44%</p> |

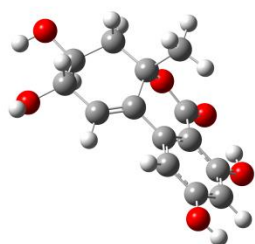

5.85%

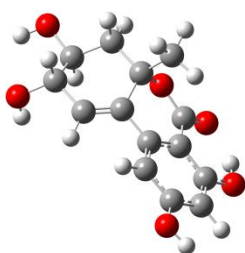

24.00%

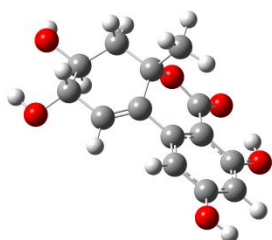

20.11%

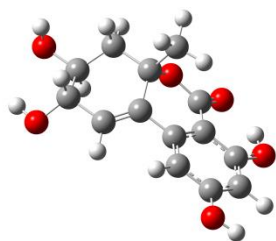

4.73%



|                                                                                     |       |
|-------------------------------------------------------------------------------------|-------|
| 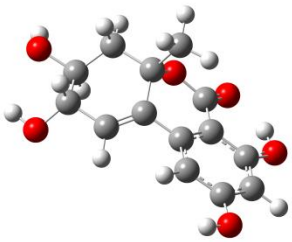   | 8.02% |
|    | 7.48% |
|  | 7.90% |
|  | 14.6% |

Figure S34. ECD conformers of alternolide C (**3**)

| 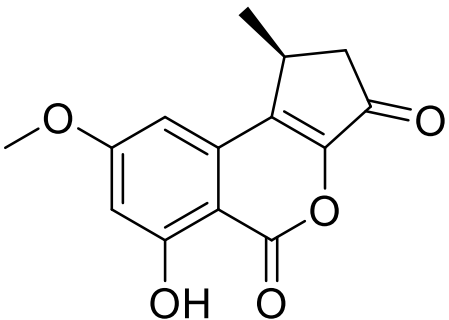  |             |
|-------------------------------------------------------------------------------------|-------------|
| Conformers                                                                          | Populations |
|    | 84.72%      |
|  | 15.28%      |

Figure S35. ECD conformers of 1-deoxyrubralactone (**9**)
